# Supplementary material
Source: Springer Nature journal article supplement (https://www.springermedizin.de/resource/supplementary/12889_2013_7141_MOESM2_ESM.pdf/9496888)

Health Centre

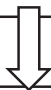

Fon

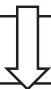

Quarter Head

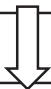

Head of Household

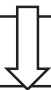

Member of Household

Supplement: MOESM2 [file 9496888]
